# Supplementary material for: Visible-light-driven photoelectrocatalytic degradation of tetracycline using dual Z-scheme Bi 2 MoO 6 /GQDs/TiO 2 heterojunctions
Source: Royal Society of Chemistry journal article supplement (doi:10.1039/d5qi02154e), 2025-12-24
Supplement: d5qi02154e1.pdf [file d5qi02154e1.pdf]

## Supporting Information

### Visible-Light-Driven Photoelectrocatalytic Degradation of Tetracycline Using Dual Z-Scheme $\text{Bi}_2\text{MoO}_6/\text{GQDs}/\text{TiO}_2$ Heterojunctions

*Feiyu Li, Kailu Liu, Hanyue Zhang, Xing Wang, Jingui Ma, Yansheng Liu and Junwei Hou*

*State Key Laboratory of Heavy Oil Processing, China University of Petroleum (Beijing)  
at Karamay, Karamay, Xinjiang 834000, China*

This part includes 7 figures.

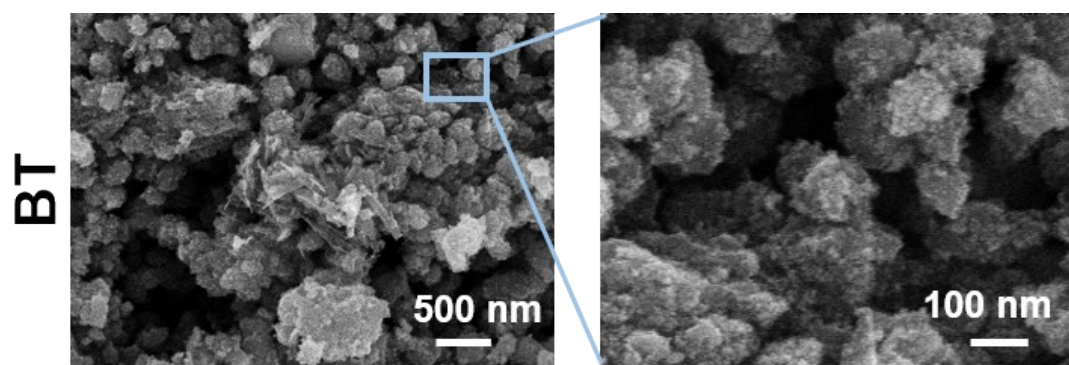

Figure S1. SEM images of BT.

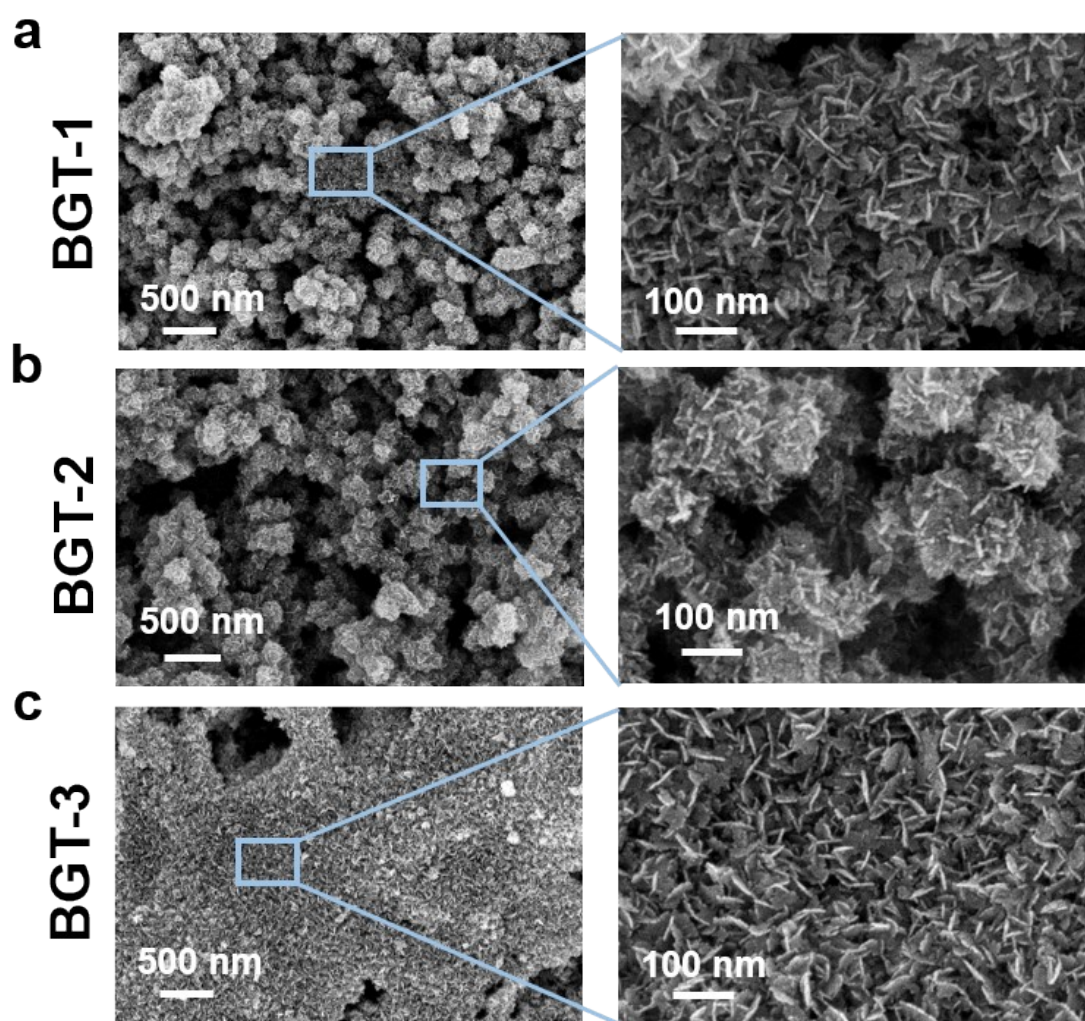

Figure S2. SEM images of (a) BGT1, (b) BGT-2 and (c) BGT-3 with different GQDs concentrations.

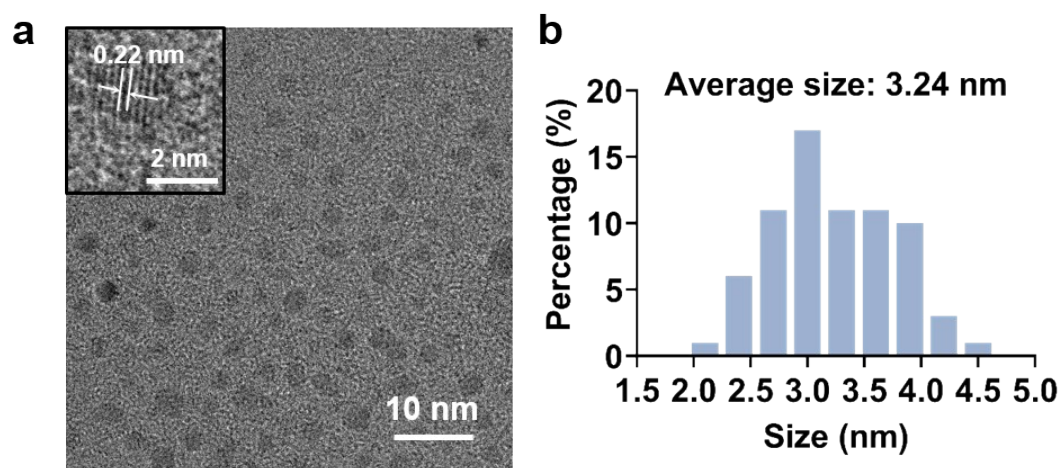

Figure S3. (a) TEM images and (b) the size distribution of GQDs.

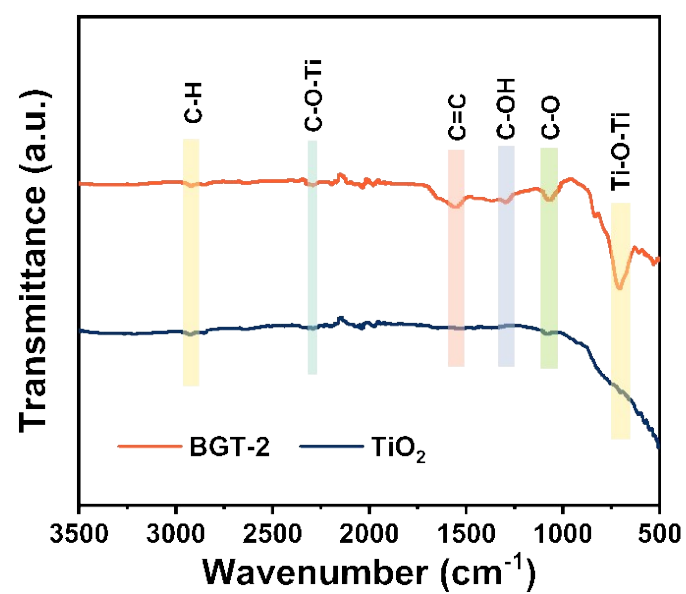

Figure S4. FTIR spectra of TiO<sub>2</sub> and BGT-2.

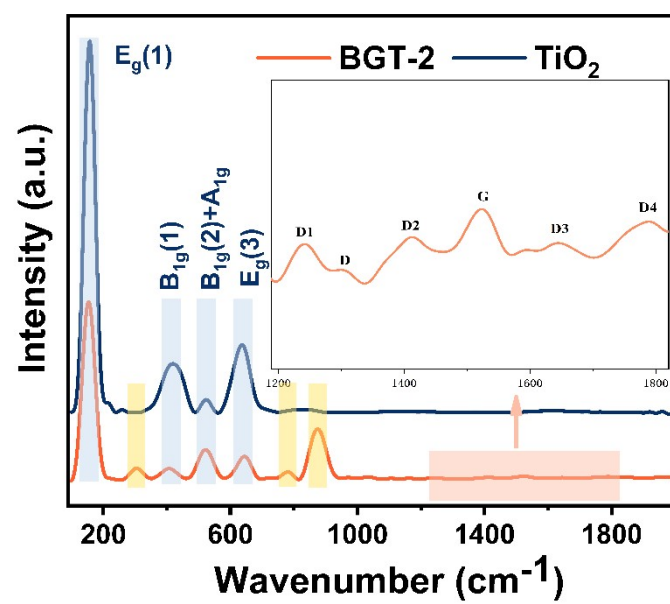

Figure S5. Raman spectra of TiO<sub>2</sub> and BGT-2.

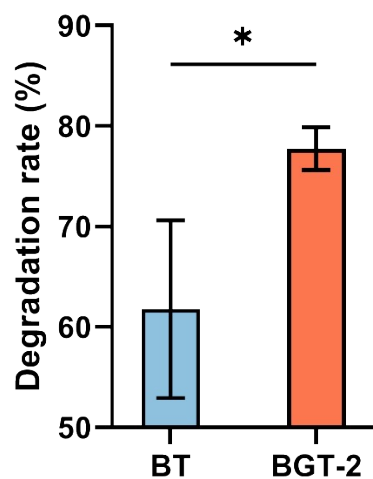

Figure S6. Statistical significance analysis of degradation rates by BGT-2 and BT photocatalyst. Statistical significance was analyzed via the two-tailed Student's t-test ( $***p < 0.001$ ,  $**p < 0.01$ , and  $*p < 0.05$ ). (  $n=5$  )

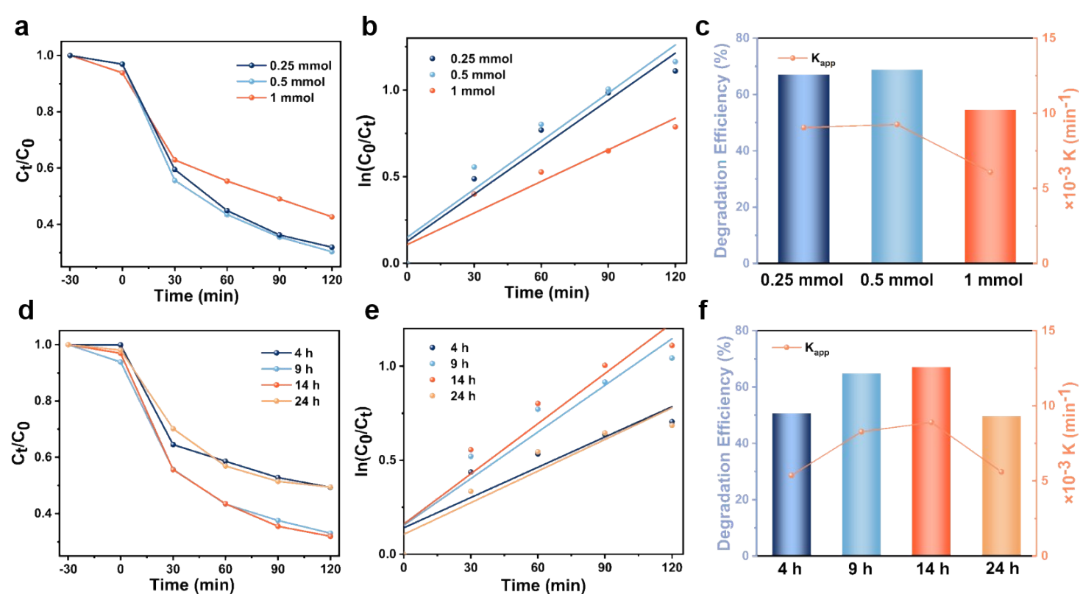

Figure S7. (a) Time-dependent photodegradation curves, (b) kinetic curves, and (c) degradation efficiency and rate constants for TC of BGT materials with different hydrothermal times. (d) Time-dependent photodegradation curves, (e) kinetic curves, and (f) degradation efficiency and rate constants for TC of BGT materials with different  $\text{Bi}_2\text{MoO}_6$  contents

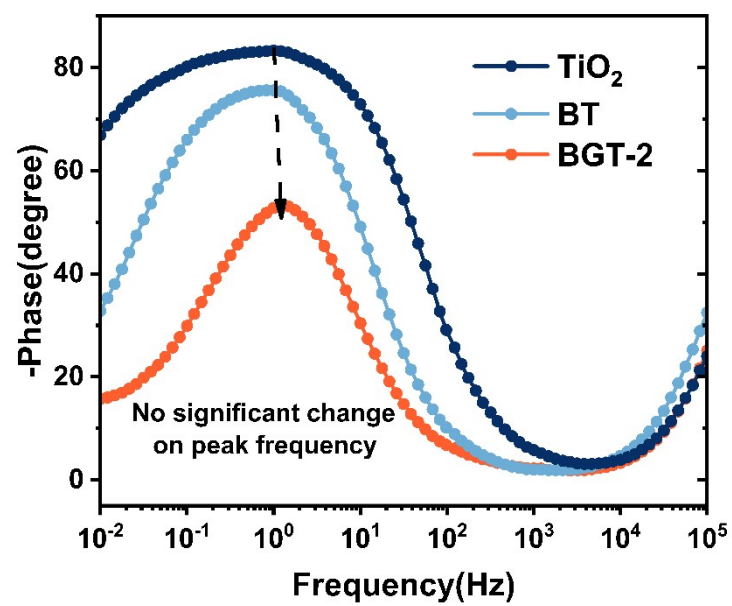

Figure S8. Bode plots of TiO<sub>2</sub>, BT, and BGT-2.

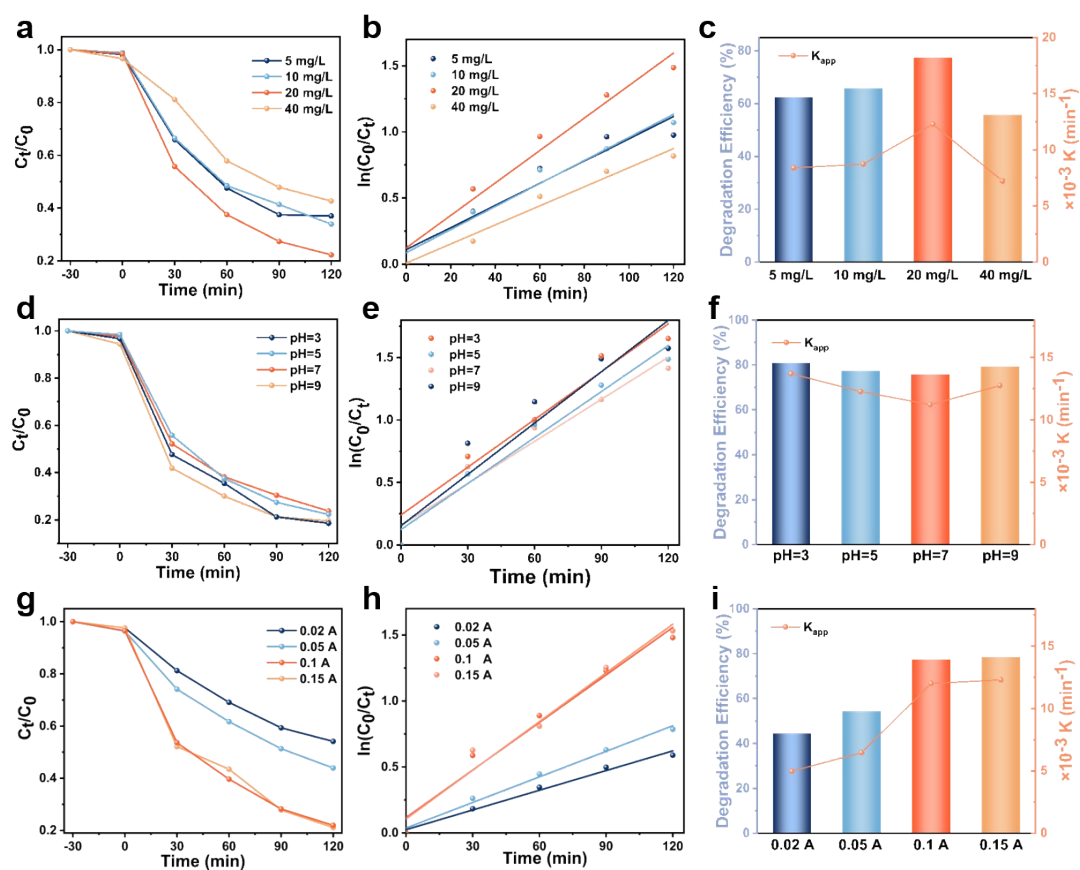

Figure S9. Time-dependent PEC degradation curves, kinetic curves, and degradation efficiency and rate constants for TC degradation of BGT-2 under different (a-c) initial concentration of TC, (d-f) pH value, and (g-i) applied current.

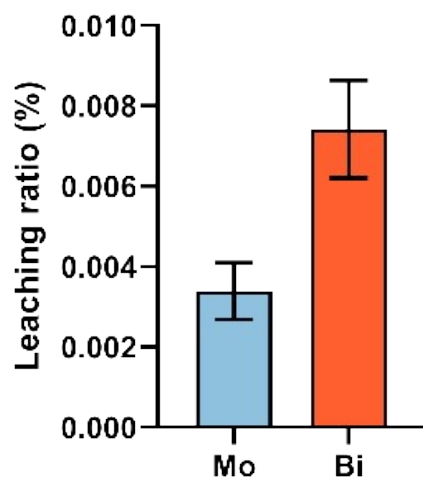

Figure S10. Ratio of Mo/Bi leaching after PEC process. (n=5)
